29 **Introduction:**

30 TFP function as motility appendages by an extension, tip attachment, and retraction order  
31 of action [1]. These thin structures (~6 nm diameter) range from 0.5-7.0  $\mu\text{m}$  in length and can  
32 generate pulling forces exceeding 100 pN [1-5]. For the bacterium *Pseudomonas aeruginosa*,  
33 TFP are known to confer motility phenotypes known as twitching and walking. *P. aeruginosa*  
34 also employs its polar flagellum to confer motility modes called swimming and swarming. The  
35 transition between flagellar-mediated motility to TFP-mediated motility is not well understood.  
36 For example, while swarming requires active flagella, the absence or over expression of TFP  
37 have been shown to influence the overall swarm phenotype [6]. Here we show that TFP facilitate  
38 a cluster development and rapid motility phenotype in a subset of cells following flagellar-driven  
39 swarming community expansion. We find that *P. aeruginosa* TFP can extend multiple cell  
40 lengths (>30 $\mu\text{m}$ ) and then retract to translocate small clusters of cells to join with other cell  
41 clusters in less than one second.

42

43 **Results and Discussion:**

44 There are two modes of *P. aeruginosa* surface motility that are routinely investigated  
45 using agar motility plate assays. Flagellar-mediated swarming is studied using 0.4%-0.6% agar  
46 and TFP-mediated twitching is studied using 1.0% agar. Both swarming and twitching are  
47 commonly assessed in these plate assays as growing and expanding *P. aeruginosa* populations  
48 that develop over hours to days. Here we detail surface motility behavior that occurs on surfaces  
49 between those conditions typically used to examine swarming and twitching (0.4-1.0% agar). We  
50 find that as *P. aeruginosa* colonies expand from the point of inoculation, small clusters of cells  
51 advance beyond the larger group. Using this approach, an open-air plate was required—covering

52 the agar (with a glass coverslip) does not promote the same cluster development. We find this  
53 clustering phenotype is conserved among *P. aeruginosa* strains, as all common laboratory strains  
54 tested (PA14, PAO1, MPAO1, PAK and PAO1C) develop clusters to some degree (Figure S1).

55 Inspection of these clusters over time shows they are transient and facilitate the  
56 restructuring of the community. Cells cluster, divide into smaller groups, and recluster numerous  
57 times within a minute. Some of these clusters move multiple cell lengths to join other clusters or  
58 the larger advancing colony within less than a second (Figure 1—top panels), thus appearing to  
59 “snap” from one region of the frame to another (Movie S1).

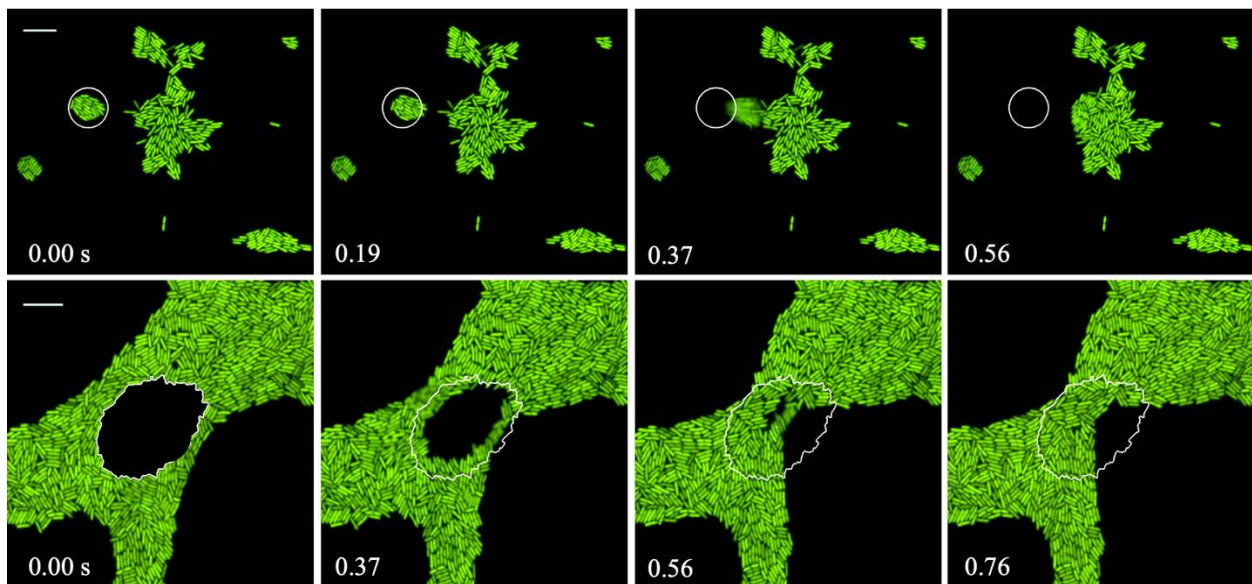

60  
61 **Fig. 1.** *P. aeruginosa* snapping and community contraction in less than 1 second. Time-lapse  
62 sequences of representative *P. aeruginosa* snapping and community contraction events are  
63 shown. Top row: advancing cluster (identified with white circle at the 0 s) prepares to snap by  
64 enhancing cluster arrangement (0.19 s), begins moving (0.37 s), and joins another cluster (0.56 s).  
65 Bottom row: A contraction snapping event. The open area surrounded by cells (traced in white—  
66 spanning 469.87  $\mu\text{m}^2$ ) is covered within 0.76 s. Scale bar represents 10  $\mu\text{m}$ .  
67

68 In all, we track cells in 115 of these snapping clusters in various assays and specifically  
69 quantify 70 snapping events in experiments containing 0.8% agar (Table 1). These snapping  
70 clusters contain an average of 17.5 cells and travel a maximum distance of 17.8  $\mu\text{m}$ , or ~4 cell  
71 lengths. Cluster size does not correlate with distance traveled or snapping duration. Likewise, no

72 apparent trend changes are attributable to the original time of assay inoculation. However, the  
73 total distance traveled by snapping clusters strongly relates with water availability in these  
74 surface motility assays. The maximum snapping distance on 0.45% agar assays is 37  $\mu\text{m}$  or ~9  
75 cell lengths, while the maximum distance cells snap on 1.0% agar is 10  $\mu\text{m}$ .

76

77 **Table 1. *P. aeruginosa* snapping behavior dynamic traits.**

| <b>Trait</b>                                  | <b>Average (<math>\pm</math> standard deviation)</b> |
|-----------------------------------------------|------------------------------------------------------|
| Cells in cluster***                           | 17.5 $\pm$ 9.60                                      |
| Cluster area at t=0 ( $\mu\text{m}^2$ )       | 67.2 $\pm$ 39.4                                      |
| Cell length                                   | 4.2 $\pm$ 0.75                                       |
| Distance travelled ( $\mu\text{m}$ )*         | 11.4 $\pm$ 3.00                                      |
| Duration (sec)**                              | 0.478 $\pm$ 0.183                                    |
| Cluster velocity ( $\mu\text{m}/\text{sec}$ ) | 26.8 $\pm$ 10.5                                      |

78 Quantification from n=70 identified snapping events for *P. aeruginosa* growing on 0.8% agar.

79 \*Pearson correlation between cells in cluster and distance travelled is 0.475.

80 \*\*Pearson correlation between cells in cluster and duration of event is 0.039.

81

82 Larger less ordered groups also exhibit this long-distance rapid cell movement as a means  
83 of community contraction. A representative example is shown in Figure 1 (bottom panels) where  
84 an open area surrounded by cells (traced in white—spanning 469.87  $\mu\text{m}^2$ ) collapses within 0.76  
85 seconds.

86 Snapping behavior requires *P. aeruginosa* TFP. Isogenic mutants deficient for TFP fail to  
87 form the small aggregates and no sub-second rapid behavior is detected (Figure 2). Further,  
88 functional TFP retraction is required as the retraction-deficient *pilU* strain also does not form  
89 clusters and exhibits behavior like the *pilA* strain. When one considers the size of PilA  
90 monomers [7] and TFP assembly [8] required to mediate snapping, nearly 17,000 PilA  
91 monomers are required to assemble TFP capable of the average event measured in our  
92 experiments. Accordingly, the pilus required to mediate the maximum distance event (of 37  $\mu\text{m}$ )  
93 contains a staggering 35,200 PilA monomers.

94

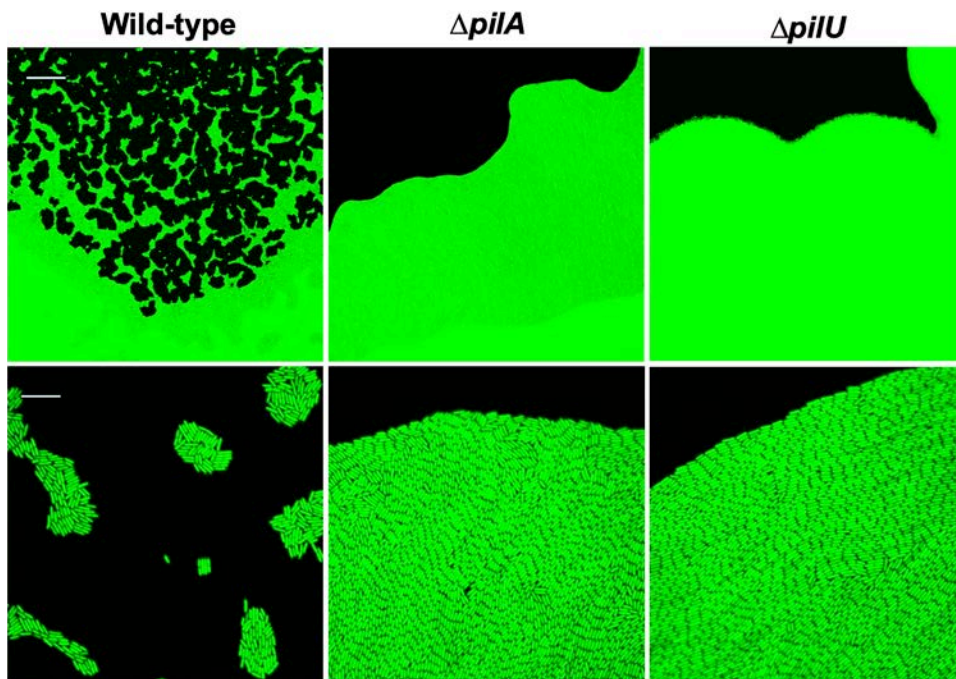

95  
96 **Figure 2.** Advancing colony phenotype of *P. aeruginosa* on motility assay plates containing 0.8%  
97 agar. Top (10× magnification) demonstrates cluster development by wild-type beyond the  
98 advancing swarm zone. TFP-deficient ( $\Delta pilA$ ) and TFP retraction-deficient ( $\Delta pilU$ ) strains make  
99 no clusters. Bottom row (100× magnification) shows arrangements of single cells, and  $\Delta pilA$  and  
100  $\Delta pilU$  appear highly ordered and tightly packed. Scale bars represent 100  $\mu\text{m}$  (top) and 10  $\mu\text{m}$   
101 (bottom).  
102

103           A lag time is seen after plate assay inoculation before snapping is observed. We also see  
104 that a functional flagellum is a required precursor to this snapping motility phenotype. On 0.5%  
105 agar assays that promote robust swarming, the lag time for cluster development and snapping is  
106 1.5-2 days (as the plates dry out). However, using an agar range of 0.8%-1.0% promotes cluster  
107 formation and snapping within a few hours post inoculation. Cells missing their polar flagellum  
108 (*fliC*) are widely dispersed and fail to develop the small clusters that form beyond the advancing  
109 large population on these surface assays (Figure 3). Thus, it appears that flagellar-mediated  
110 swarming can serve as an initial step to establish the needed population of cells to subsequently  
111 form cell clusters that will snap together using their TFP.

112 Having established TFP as the appendages that mediate snapping, we investigate the  
113 additional biological factors required. We find that snapping also requires the surfactant  
114 rhamnolipid. Cells from a rhamnolipid-deficient strain ( $\Delta rhlAB$ ) can move away from the  
115 uniformly expanding *P. aeruginosa* colony and form some clusters, but these bacteria never  
116 exhibit snapping motion (Figure 3).

117

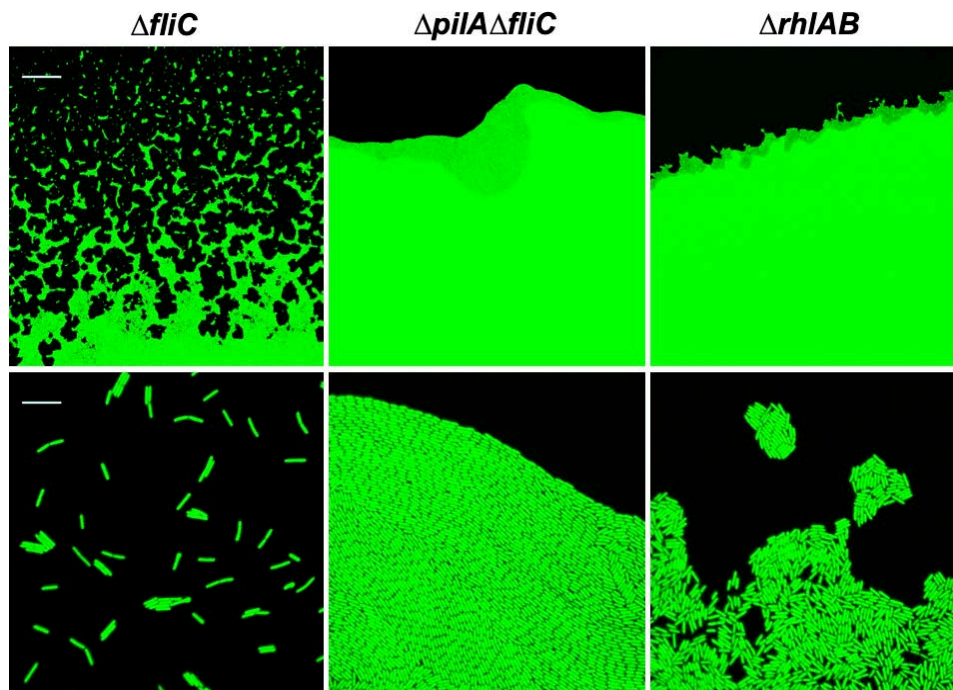

118

119 **Figure 3.** Colony edge and clustering phenotype of *P. aeruginosa* mutants on 0.8% agar. Top  
120 (10× magnification): Flagella-deficient ( $\Delta fliC$ ) are mostly sparsely distributed at the single-cell  
121 level, while the appendage-deficient strain ( $\Delta pilA\Delta fliC$ ) do not form cells clusters. Rhamnolipid-  
122 deficient ( $\Delta rhlAB$ ) cells make a reduced number of smaller clusters closer to the colony edge.  
123 Bottom row (100× magnification) show arrangements of single cells (mono-layer). Images were  
124 obtained using confocal microscopy twelve hours after inoculation. Top (10× magnification)  
125 Scale bars represent 100  $\mu\text{m}$  (top) and 10  $\mu\text{m}$  (bottom).

126

127 We next examine the potential role of DNA as a marker and promoter of snapping  
128 motility as previous studies have shown the ability of *P. aeruginosa* TFP to track to exogenous  
129 DNA as a component of biofilm development [9,10]. We find that snapping precedes the

130 presence of detectable DNA in these small cell groups. Snapping is observed to occur in the  
131 same experiment as “explosive cell lysis” [11]. Figure 4 shows snapping of a small cluster in a  
132 region with no exogenous DNA while a cell simultaneously explodes to release DNA in a  
133 separate region (sequence included as Movie S2). Thus, we conclude that snapping does not  
134 require TFP-DNA interaction and is distinct from TFP actions mediated by exogenous DNA.

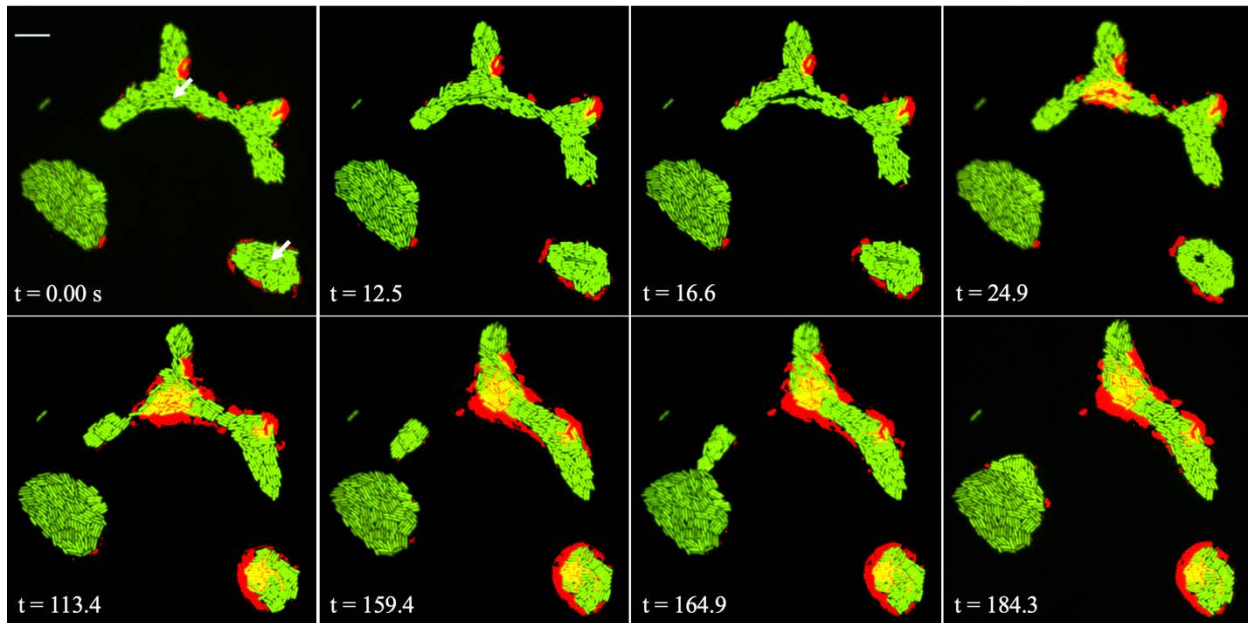

135  
136 **Figure 4.** Sequence of events demonstrating eDNA release from a lysing cell within the same time  
137 span as snapping motility that occurs elsewhere in the same frame. A cell ready to lyse (top arrow,  
138 0.00 s) ceases production of GFP (12.5 s), explodes by 16.6 s, and releases its exogenous DNA at  
139 24.9 s. The red color indicates the DNA released by the lysing cell. A cluster begins to pull away  
140 (113.4 s) from the cluster exhibiting a high concentration of high eDNA and snaps onto a different  
141 cluster by the 116.9 s. Scale bar represents 10  $\mu\text{m}$ .

142  
143 Since DNA did not serve as an attractant for snapping clusters, we next investigate the *P.*  
144 *aeruginosa* polysaccharides Pel and Psl, which have been shown important to *P. aeruginosa*  
145 surface motility and aggregation as a stage in biofilm development [12,13]. Similarly, the  
146 bacterium *Myxococcus xanthus* is well known to require exopolysaccharide to confer “social”  
147 TFP-mediated motility [14-16]. However, we find that the Pel and Psl polysaccharides for *P.*  
148 *aeruginosa* do not confer cluster development or the snapping phenotype. Elimination of either

149 or both the Pel and Psl polysaccharides actually leads to increased cluster development and  
150 equivalent snapping events to that we observe for the wildtype (Figure 5).

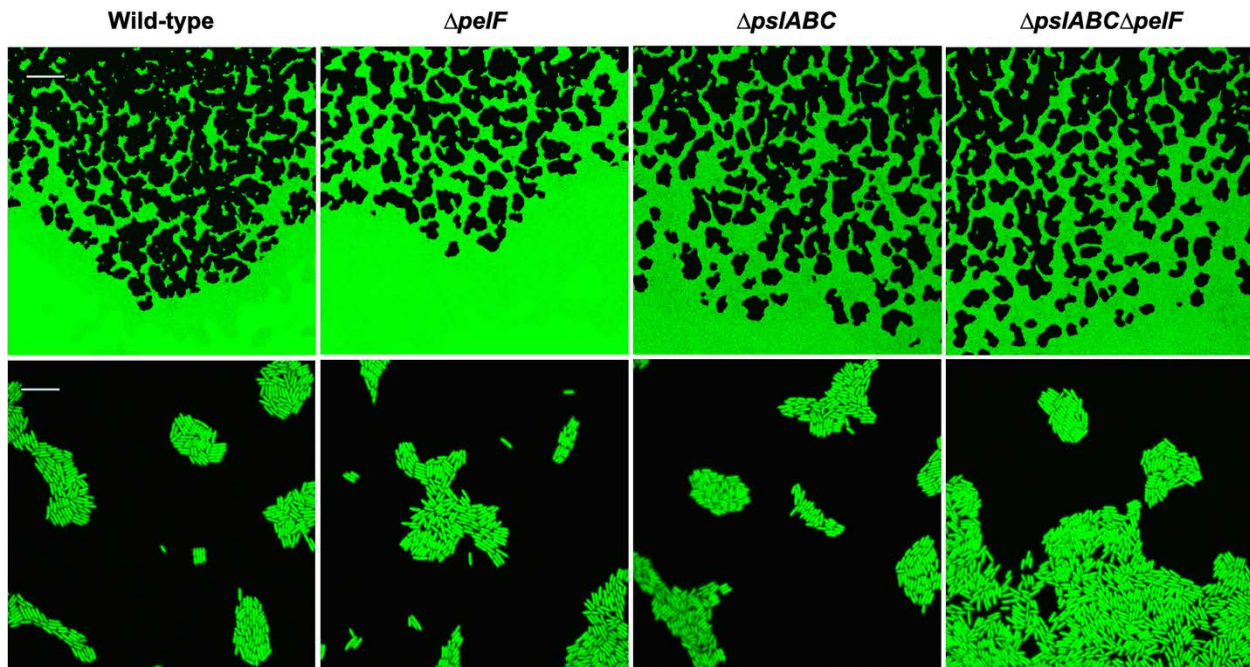

151  
152  
153 **Figure 5.** Top (10× magnification) demonstrates cluster formation by Pel-deficient ( $\Delta pelF$ ), Psl-  
154 deficient ( $\Delta pslABC$ ), and polysaccharide-deficient ( $\Delta pslABC\Delta pelF$ ) in similar fashion as the wild-  
155 type. Bottom row (100× magnification) shows the arrangements of single cells (mono-layer)  
156 within these clusters and advancing swarm edges. Bottom row (100× magnification) show clusters  
157 at of single cell level. Scale bar represent 100  $\mu m$  (top) and 10  $\mu m$  (bottom).  
158

159 Here we detail TFP-dependent snapping in the bacterium *P. aeruginosa*. Our probing of  
160 cluster development on semi-solid surfaces suggests that snapping occurs readily as small groups  
161 of *P. aeruginosa* cells rapidly restructure the surrounding community within seconds.

162

## 163 **Materials and Methods**

164 **Bacteria strains and growth medium.** Strains of *Pseudomonas aeruginosa* used in this study are  
165 included in Table S1. Cultures were streaked from frozen (-80°C) stocks onto LB agar plates  
166 (1.5% wt/vol) and incubated at 37°C overnight. Isolated colonies selected and grown



167 planktonically in 6 mL FAB with 30 mM glucose [6,17] at 37°C with shaking at 240 rpm for 12-  
168 15 hrs.

169 ***Isogenic mutant construction.*** Primers and gBLOCK nucleotides used for this work are  
170 included in Table S2. Plasmid pCSM1 was constructed to allow creation of a markerless  
171  $\Delta pslABC$  mutant. pCSM1 was constructed by inserting a single gBLOCK of double-stranded  
172 DNA (IDT, Coralville, IA) containing both regions upstream of the *pslA* gene and downstream  
173 of the *pslC* gene according to the *Pseudomonas* genome database [18]; this gBLOCK was  
174 restricted using EcoRI and HindIII and ligated into the pEX18Ap vector between the EcoRI and  
175 HindIII sites and expressed in *E. coli* DH5 $\alpha$ .

176 Similarly, plasmids pNMS and pCSM103 were constructed to allow creation of a markerless  
177  $\Delta rhlAB$  and  $\Delta fliC$  mutants. pNMS utilized a single gBLOCK containing both regions upstream  
178 of the *rhlA* gene and downstream of the *rhlB* gene and pCSM103 contained regions upstream  
179 and downstream of the *fliC* gene. These amplified gBLOCK products were ligated into the  
180 pEX18Gm plasmid [19] following SLiCE protocols [20].

181 Mutations were introduced using conjugational mating. Single cross-over recombinants were  
182 selected on LB plates (1.5% agar wt/vol), augmented with 100 $\mu$ g/ml carbenicillin (pNMS,  
183 pCSM1 and pCSM103) or 100 $\mu$ g/ml gentamycin (pEX18Gm $\Delta pelF$ ). Double crossover  
184 recombinants were then selected on 5% wt/vol sucrose LB plates. Deletions were confirmed by  
185 comparing PCR amplification of the target region with the PAO1C wildtype.

186 ***Constitutive fluorescent strain construction.*** Plasmids harboring a Tn7 region containing green  
187 fluorescent protein under control of a constitutive strong promoter were incorporated into *P.*  
188 *aeruginosa* strains by conjugational mating. Either plasmid pBK miniTn7-gfp2 (harboring  
189 gentamycin resistance) or pBK miniTn7-gfp3 (harboring kanamycin and streptomycin

190 resistance) were incorporated adjacent to *glmS* on the *P. aeruginosa* chromosome using helper  
191 plasmid pUX-BF13 and mobilization plasmid pRK600. Transgenic cells were selected on LB  
192 agar supplemented with 100µg/mL gentamycin or 250µg/mL kanamycin and 250µg/mL  
193 streptomycin and confirmed by PCR detection of the chromosomal insertions and microscopy  
194 inspection for fluorescence.

195 **Surface motility assays.** Surface motility plate assays were composed of modified fastidious  
196 anaerobe broth (FAB) media that included 0.1% casamino acid (wt/vol) and no ammonium  
197 sulfate ((NH<sub>4</sub>)<sub>2</sub>SO<sub>4</sub>) [6,17]. Surface motility was evaluated over a range of Noble Agar  
198 concentrations between 0.4%-3.0% (wt/vol). Plate assays were spot inoculated by pipetting 1µm  
199 log-phase cells onto the center of the 60mm Petri dish and quickly transferred to a laminar hood  
200 for 3-5 minutes with lids partially open, promoting rapid absorption of the inoculation droplet  
201 into the motility agar. All plates were inverted and incubated at 30°C in a humidity-controlled  
202 (85% RH) incubator for 15-30 h. Prior to imaging, motility plates were equilibrated to room  
203 temperature for 45-60 minutes.

204 **Microscopy and imaging.** Imaging was carried out using a Nikon Eclipse Ti-E Inverted  
205 microscope equipped with Plan Fluor 10X DIC LN1 and 100X LU Plan Fluor objectives and  
206 Andor DU-888 X-10006 camera with Emission wavelength = 535, Excitation wavelength = 470.

207 **Image processing and analysis.** Images were processed using Nikon NIS-Element software and  
208 further analyzed using Fiji image processing package (3). Using tools in these software  
209 packages, size of clusters, distance and speed travelled by a cluster were determined.

210

## 211 **References:**

- 212 1 Skerker, J.M., and Berg, H.C. (2001). Direct observation of extension and retraction of type IV pili. Proc Natl  
213 Acad Sci USA 98, 6901-6904.
- 214 2 Touhami, A., *et al.* (2006). Nanoscale characterization and determination of adhesion forces of *Pseudomonas*  
215 *aeruginosa* pili by using atomic force microscopy. J Bacteriol 188, 370-377.

- 216 3 Maier, B., *et al.* (2002). Single pilus motor forces exceed 100 pN. *Proc Natl Acad Sci USA* *99*, 16012-16017.  
217 4 Merz, A.J., *et al.* (2000). Pilus retraction powers bacterial twitching motility. *Nature* *407*, 98-102.  
218 5 Clausen, M., *et al.* (2009). High-force generation is a conserved property of type IV pilus systems. *J Bacteriol*  
219 *191*, 4633-4638.  
220 6 Anyan, M.E., *et al.* (2014). Type IV pili interactions promote intercellular association and moderate swarming of  
221 *Pseudomonas aeruginosa*. *Proc Natl Acad Sci USA* *111*, 18013-18018.  
222 7 Craig, L., *et al.* (2006). Type IV Pilus Structure by Cryo-Electron Microscopy and Crystallography: Implications  
223 for Pilus Assembly and Functions. *Molecular Cell* *23*, 651-662.  
224 8 Chang, Y.-W., *et al.* (2016). Architecture of the type IVa pilus machine. *Science* *351*.  
225 9 Barken, K.B., *et al.* (2008). Roles of type IV pili, flagellum-mediated motility and extracellular DNA in the  
226 formation of mature multicellular structures in *Pseudomonas aeruginosa* biofilms. *Environ Microbiol* *10*,  
227 2331-2343.  
228 10 Webb, J.S., *et al.* (2003). Cell death in *Pseudomonas aeruginosa* biofilm development. *J Bacteriol* *185*, 4585-  
229 4592.  
230 11 Turnbull, L., *et al.* (2016). Explosive cell lysis as a mechanism for the biogenesis of bacterial membrane vesicles  
231 and biofilms. *Nature Communications* *7*.  
232 12 Sheth, H., *et al.* (1994). The pili of *Pseudomonas aeruginosa* strains PAK and PAO bind specifically to the  
233 carbohydrate sequence  $\beta$ GalNAc (1-4)  $\beta$ Gal found in glycosphingolipids asialo-GM1 and asialo-GM2.  
234 *Mol Microbiol* *11*, 715-723.  
235 13 Zhao, K., *et al.* (2013). Psl trails guide exploration and microcolony formation in *Pseudomonas aeruginosa*  
236 biofilms. *Nature* *497*, 388-391.  
237 14 Kaiser, D. (1979). Social gliding is correlated with the presence of pili in *Myxococcus xanthus*. *Proceedings of*  
238 *the National Academy of Science U S A* *76*, 5952-5956.  
239 15 Youderian, P., and Hartzell, P.L. (2007). Triple mutants uncover three new genes required for social motility in  
240 *Myxococcus xanthus*. *Genetics* *177*, 557-566.  
241 16 Lu, A., *et al.* (2005). Exopolysaccharide biosynthesis genes required for social motility in *Myxococcus xanthus*.  
242 *Mol Microbiol* *55*, 206-220.  
243 17 Morales-Soto, N., *et al.* (2015). Preparation, imaging, and quantification of bacterial surface motility assays. *J*  
244 *Vis Exp*.  
245 18 Winsor, G.L., *et al.* (2016). Enhanced annotations and features for comparing thousands of *Pseudomonas*  
246 genomes in the *Pseudomonas* genome database. *Nucleic Acids Res* *44*, D646-653.  
247 19 Hoang, T.T., *et al.* (1998). A broad-host-range Flp-*FRT* recombination system for site-specific excision of  
248 chromosomally-located DNA sequences: application for isolation of unmarked *Pseudomonas aeruginosa*  
249 mutants. *Gene* *212*, 77-86.  
250 20 Zhang, Y.W., *et al.* (2012). SLiCE: a novel bacterial cell extract-based DNA cloning method. *Nucleic Acids Res*  
251 *40*.  
252 21 Shrout, J.D., *et al.* (2006). The impact of quorum sensing and swarming motility on *Pseudomonas aeruginosa*  
253 biofilm formation is nutritionally conditional. *Mol Microbiol* *62*, 1264-1277.  
254 22 Morales-Soto, N., *et al.* (2018). Spatially dependent alkyl quinolone signaling responses to antibiotics in  
255 *Pseudomonas aeruginosa* swarms. *J Biol Chem* *293*, 9544-9552.  
256 23 Colvin, K.M., *et al.* (2012). The Pel and Psl polysaccharides provide *Pseudomonas aeruginosa* structural  
257 redundancy within the biofilm matrix. *Environ Microbiol* *14*, 1913-1928.  
258 24 Kessler, B., *et al.* (1992). A general system to integrate *lacZ* fusions into the chromosomes of gram-negative  
259 eubacteria: regulation of the *Pm* promoter of the TOL plasmid studied with all controlling elements in  
260 monocopy. *Mol Gen Genet* *233*, 293-301.  
261 25 Bao, Y., *et al.* (1991). An improved Tn7-based system for the single-copy insertion of cloned genes into  
262 chromosomes of gram-negative bacteria. *Gene* *109*, 167-168.  
263 26 Koch, B., *et al.* (2001). A panel of Tn7-based vectors for insertion of the *gfp* marker gene or for delivery of  
264 cloned DNA into Gram-negative bacteria at a neutral chromosomal site. *J Microbiol Meth* *45*, 187-195.  
265

## 266 **Acknowledgements:**

267 This work was supported by NIH grants 1R21AI109417 (JDS) and 1DP2OD008468  
268 (SWL).

269           The PA14 $\Delta pelF$  strain and pEX18Gm $\Delta pelF$  plasmid were provided by Matthew Parsek,

270   University of Washington-Seattle.

271

272

273 **Supplementary Materials:**

274 Tables S1-S2

275 Figure S1

276 Movies S1-S2

277

278

279 **Table S1. Strain list**

| Strain or plasmid           | Relevant Characteristics                                                                   | Source or reference |
|-----------------------------|--------------------------------------------------------------------------------------------|---------------------|
| <u><i>P. aeruginosa</i></u> |                                                                                            |                     |
| Wild type (wt)              | wildtype PAO1C                                                                             | [6,21]              |
| wt-GFP                      | PAO1C::miniTn7 gfp2; Cm <sup>r</sup> , Gm <sup>r</sup>                                     | [6,21]              |
| wt-mCherry                  | PAO1C::mini-Tn7-Gm-P <sub>A1/04/03</sub> -mCherry                                          | [6]                 |
| $\Delta pilA$               | PAO1C $\Delta pilA$ ; markerless                                                           | [6,21]              |
| $\Delta pilA$ -GFP          | $\Delta pilA$ miniTn7 gfp2; Cm <sup>r</sup> , Ap <sup>r</sup> , Gm <sup>r</sup>            | [6]                 |
| $\Delta pilU$               | PAO1C $\Delta pilU$ ; markerless                                                           | [6]                 |
| $\Delta pilU$ -GFP          | $\Delta pilU$ ::miniTn7 gfp2; Cm <sup>r</sup> , Ap <sup>r</sup> , Gm <sup>r</sup>          | [6]                 |
| $\Delta rhlAB$              | PAO1C $\Delta rhlAB$ ; markerless                                                          | This study          |
| $\Delta rhlAB$ -GFP         | $\Delta rhlAB$ ::miniTn7-gfp2; Cm <sup>r</sup> , Ap <sup>r</sup> , Gm <sup>r</sup>         | This study          |
| $\Delta fliC$               | PAO1C $\Delta fliC$ ; markerless                                                           | This study          |
| $\Delta fliC$ -GFP          | PAO1C $\Delta fliC$ ::miniTn7-gfp3; Tc <sup>r</sup> , Km <sup>r</sup> , Sm <sup>r</sup>    | This study          |
| $\Delta psl$                | PAO1C $\Delta pslABC$ ; markerless                                                         | This study          |
| $\Delta psl$ -GFP           | $\Delta pslABC$ ::miniTn7-gfp2; Cm <sup>r</sup> , Ap <sup>r</sup> , Gm <sup>r</sup>        | This study          |
| $\Delta pelF$               | PAO1C $\Delta pelF$ ; markerless                                                           | This study          |
| $\Delta pelF$ -GFP          | $\Delta pelF$ ::miniTn7-gfp2; Cm <sup>r</sup> , Ap <sup>r</sup> , Gm <sup>r</sup>          | This study          |
| $\Delta psl\Delta pel$      | PAO1C $\Delta pslABC\Delta pelF$ ; markerless                                              | This study          |
| $\Delta psl\Delta pel$ -GFP | $\Delta psl\Delta pel$ ::miniTn7-gfp2; Cm <sup>r</sup> , Ap <sup>r</sup> , Gm <sup>r</sup> | This study          |
| PA14-GFP                    | wildtype PA14::miniTn7 gfp2; Cm <sup>r</sup> , Gm <sup>r</sup>                             | [22]                |
| PA14pelF                    | PA14 $\Delta pelF$                                                                         | [23]                |
| PAO1-GFP                    | wildtype PAO1::miniTn7 gfp2; Cm <sup>r</sup> , Gm <sup>r</sup>                             | This study          |
| MPAO1-GFP                   | wildtype MPAO1::miniTn7 gfp2; Cm <sup>r</sup> , Gm <sup>r</sup>                            | This study          |
| PAK-GFP                     | wildtype PAK::miniTn7 gfp2; Cm <sup>r</sup> , Gm <sup>r</sup>                              | This study          |
| <u>Plasmids</u>             |                                                                                            |                     |
| pEX18Ap                     | Suicide gene replacement vector, Ap <sup>r</sup>                                           | [19]                |
| pRK600                      | Mobilization plasmid, Cm <sup>r</sup>                                                      | [24]                |
| pUX-BF13                    | Helper plasmid, Ap <sup>r</sup>                                                            | [25]                |
| pBK-miniTn7-gfp2            | mini Tn7-gfp2; Cm <sup>r</sup> , Ap <sup>r</sup> , Gm <sup>r</sup>                         | [26]                |
| pBK-miniTn7-gfp3            | mini Tn7-gfp3::Cm <sup>r</sup> , Ap <sup>r</sup> , Km <sup>r</sup> , Sm <sup>r</sup>       | [26]                |
| pNMS                        | <i>rhlAB</i> allelic replacement vector in pEX18Gm; Gm <sup>r</sup>                        | This study          |
| pEX18Gm $\Delta pelF$       | pEX18Gm:: $\Delta pelF$ allelic replacement vector; Gm <sup>r</sup>                        | [23]                |
| pCSM1                       | <i>pslABCD</i> allelic replacement vector in pEX18Ap; Amp <sup>r</sup>                     | This study          |
| pCSM103                     | <i>fliC</i> allelic replacement vector in pEX18Gm; Gm <sup>r</sup>                         | This study          |

280

281 **Table S2. Primers and gBLOCK sequences**

| <b>Primers</b> | <b>Sequence (5' → 3')</b>                                                                                                                                                                                                                                                                                                                                                                                                                                                                                                                                                                                                                                                                                                                                                                                                                                                                                                                                                                                                                                                                                                                                                                                                          |
|----------------|------------------------------------------------------------------------------------------------------------------------------------------------------------------------------------------------------------------------------------------------------------------------------------------------------------------------------------------------------------------------------------------------------------------------------------------------------------------------------------------------------------------------------------------------------------------------------------------------------------------------------------------------------------------------------------------------------------------------------------------------------------------------------------------------------------------------------------------------------------------------------------------------------------------------------------------------------------------------------------------------------------------------------------------------------------------------------------------------------------------------------------------------------------------------------------------------------------------------------------|
| PelF-up        | ACCAGCAGGATGCGTTTGTGA                                                                                                                                                                                                                                                                                                                                                                                                                                                                                                                                                                                                                                                                                                                                                                                                                                                                                                                                                                                                                                                                                                                                                                                                              |
| PelF-down      | TGGTACTGGGAAGTGGCCTA                                                                                                                                                                                                                                                                                                                                                                                                                                                                                                                                                                                                                                                                                                                                                                                                                                                                                                                                                                                                                                                                                                                                                                                                               |
| rhlAB-F        | CACGCTGAGCAAATTGTTCG                                                                                                                                                                                                                                                                                                                                                                                                                                                                                                                                                                                                                                                                                                                                                                                                                                                                                                                                                                                                                                                                                                                                                                                                               |
| rhlAB-R        | CGAAGATCTACGCCAATGAAGG                                                                                                                                                                                                                                                                                                                                                                                                                                                                                                                                                                                                                                                                                                                                                                                                                                                                                                                                                                                                                                                                                                                                                                                                             |
| rhlAB gBLOCK   | CAGGAAACAGCTATGACCATGATTACGAATTCGCGAGCCTCGTTCCAGAGCATCCG<br>GCTCTGGTCTGAACAGGCTGTCTGCTCCAGACCACCATTTCCGAGGAGCGCAGGCCGT<br>TGAGGATCGCCGGATCCACGGCCCCGTAGTTCTGCATCTGGTATCGCTCCAGCCAG<br>GCCTTGGGATAGGTGCCATGGACCTCGGTCTTCGGCCGGGTGAAGGGAATCGTGTG<br>GCGCACGCCATAGGCGTAGTAATCGAAGCCCAGGCGCCGCACTTCCTTTCCAGGA<br>CGCGAACACGCCCTGGCTGTCGTGGATCGGCTGCATCTCGCTACGCAAACCGTCC<br>CACCACAGCAAAAAGCCTCCGTCATTCTCATTGCAGTAAGCCCTGATCGATAAAA<br>TGCATCACAGCAGAATTGGCCCCGGGTATGACGCTGTCAAGCGCGCAGCCTTGCCG<br>ATACGGCAAATCATGGCAACCCTATCTGTTATGCCAGCACCGTTCAGGACCGCAT<br>TTCACACCTCCCAAAAATTTTCGAACAGGCAAACAGCTATCGCTGCCACGGGTATC<br>CCGGCATTACGTAGAGTTCGTTCTTATTGTTTCGAACGGCAGACAAGTAACTCAGCG<br>GCCATCCGCGCGGACCAGCCACGGCGGATGCGTACCCCTTCAGGCGAGGGGCTTGT<br>GTGGGTCTTGCAGATCGGCCTGCGCAAACGATTGGCGTCCGTGTTACGCGTAGCC<br>GATGAACACTTTTTAGCCAATTCGAAAGCTAACGGTAACTGCCAGATTTACAGGA<br>CGGGCGGCCGCTGCGCATAAGCCCCTGCCCGCCGCGATAAGGCGTGCCAGAGC<br>GGCCGGCGGGGAACAGCGAGGGGTGGCGGAAAAGGCATGAAAAACCGGGCGC<br>CAGGCCCGGTTTCCGGTGTGCAAACGCTCTGGCGTCAGGCTTTTGGCAGGGTCACG<br>CCGCGCTGGCCCTGGTATTAAGCTTGGCACTGGCCGTCGTTTTACAACGTC                                                                                                                              |
| fliC-F         | TGCTTTGCTATCGCGACAGTC                                                                                                                                                                                                                                                                                                                                                                                                                                                                                                                                                                                                                                                                                                                                                                                                                                                                                                                                                                                                                                                                                                                                                                                                              |
| fliC-R         | GGCCATAATCCATCTCCGTCAA                                                                                                                                                                                                                                                                                                                                                                                                                                                                                                                                                                                                                                                                                                                                                                                                                                                                                                                                                                                                                                                                                                                                                                                                             |
| fliC GBlock    | TGCTTTGCTATCGCGACAGTCTCCCGGTCACGCGGGTGAAGAACCCTTCCAGGGACT<br>GGCTGGAGGCGATCCGCGCGCACCTGGCCGATGCAGACGCCAACGCCGCGGCCGGC<br>GCGCAGTTGCGCGAGGCGGTGCGCCGCGACTGGATGCTCGAAGGCGCGCATCTCGA<br>GGCATGGGCGGCGAGCCTGGCTGCCGACTGAATCCGGGTTTTTCTCGAACGAGGCC<br>GGTGGCGCAAGCCATCGGCCTTTTTTTCATGCCCGCGTGCCCTGTTGCACGGGAGGG<br>CTAAAGAAAATCGCCGGGGGGTTCGATGCAATGGGTGTCGGAACCTCCACCCTCTGC<br>CGGACCAACCGGGGGCGGTTTCAGGACCGATATTGGCGAGTCTCTTCGAAGCATGT<br>AACCCACTGAAGAGGAAGAGAAAAAGAAAATGTTGATTTTTTCTCTAAAGCTCCGC<br>CGGGAAACCGCGATAAACACCATGAACGCGAATTCTTGGGGCACCTGAGCAAGCAG<br>GCCGAGAGATCGCAAGCTCAGGTAACCGAAATAGGTCTTTGGAGGAAATCACCAT<br>GGCCCGCTAAGCCCGGGAACGGTCACTCACGCGTACTGGGAGGAAGGGGTGACCC<br>TTCCTCCCTTTTCCCTTTGCGAGGCATGAGAAAATGGACGTCGGAATATCACTTCCC<br>TTTCTACGTTCAAGACCGGCAGGGCCCCGGAGGCCAGCGGCGATATCTTTGCGCCGC<br>GCAGCGCAGCGGATGGCAGCGGCAAACCGTTGCCGGAAGTGACGGCTTCCCGGGAG<br>GCCAGCGAATCTCGCGATGACCTGGGGCTCGCCGTCAGCGACATCCAGTCTTTCGTG<br>CAGAGCGTCAAGCGCAACTTGAACCTCAGCATCGACACTCCTCTGGCCAGGTCTGT<br>GGTCAAGGTGATCGACGGTACTCGGGCGAAGTCGTGCGGCAAATCCCTTCCGAAG<br>AAGTACTAAAACCTTGCCGCCCGGCTCGACGACGTACACAGTGCCTGTTTCGAAACCC<br>GCGCCTGACGCGCGGGTTGAACGACTTGGCATGGTGCTTGCCTATCGAAGGGATA<br>GGCAGTACATGCACGGTTTTTTGACGGAGATGGATTATGGCC |

pslABC-F TACGGCCAGTACCTGAACTACCA

pslABC-R TTCCGGCCCCGATCTTCATCAA

---

pslABC GCTTGAATTCGGCAAACGTCCGCCAAGCCCCCAGGTCGGACCGGCACGCTCGAAC  
gBLOCK GGCCAACTGCGTCATGGAACCGCAGGCGCATCCTGCCAGCCAGCCCGCAGCGCC  
AGTGGACAGGCGGGTCGTCGAACCGGCGGCTGGCCACCTGGCCGAGCGGCCTGCC  
TCACCTTTCGCCCGCTTCGCTTCCCAGGCCAGAGCGCTCGCGGATTGGCGGCGTCA  
GATTTCCCTCGTCTACTGTTTGGATAAAAAGTTTGGCGCCAGAAATACGTCAATAAATT  
GACTAAAAAACTTACCCAGACTACGGATATTTCCCTGGGAATGCTAAGATAGCTA  
TCACAAAGCCACTATCGACGAATGAACCTATTCGACGGGAAAATGACTAAACCGCG  
TGGCAAATGAAAAATAGTCACTAAATTGACGCTTCACCGCCTTGCTCTCCCTATCC  
ACTCAATGGACTGCCCGTGATCGGCAGAGCAAACAACACATCATGACCTACAGGAA  
GTGCTCCCTCATGAAACGCACCCTCCTCATGCTCGCCATGCTCGCCCTGGCCGCATG  
CAACACCCCGCACGGATTCCCGCACCGGACAGCGACACCGTGGACAGCGGCAAGC  
GTGCCCTGGAAGAACTCGCCAGGCTACCGCCGGCGATGGAGCGGGTGC GCGTCGGG  
GACACCCTGCGGATCGTCCGCGATGCCGGGGAGATGCCGACCCTCTCGGCGTTCAA  
CGTCGCCACCATCTATGAACTGACGCTGTACACCGTGCTCAACGACGGCAGCATCTA  
CTATCCGTTTCATCGGTTCGCATCCAGGCCGCGACCGCACGCCGAGGAAATCGCCA  
ACGAGCTGACCACCAAGCTCGCGCCGATCTACCGCGAGCCGCGGGTACGGTGAAC  
ATCAACCAGGCGCCGGGCAATACGGTGTTTCGTCGGCGGCGCGGTGCGCAACCCGTC  
GGCCGTGCCGATCCCCGCCCAACAACATGAAGCTTGCTT

---

283

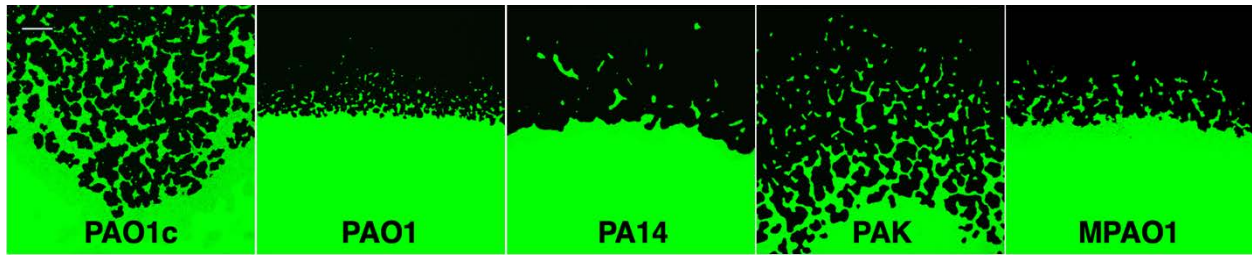

284 **Fig. S1.** Cluster formation is conserved among wild-type *P. aeruginosa* strains on 0.8% agar. Scale  
285 bar represent 100  $\mu\text{m}$ .

286

287

288

289 **Supplemental Movie Captions:**

290

291 Movie S1. *P. aeruginosa* snapping motility. The cluster in the upper right of frame undergoes  
292 some cell-cell rearrangement and then snaps to the larger cluster from right-to-left. (5.3 frames  
293 per second)

294

295 Movie S2. *P. aeruginosa* rapid community contraction. The open area surrounded by cells  
296 (spanning 469.87  $\mu\text{m}^2$ ) is covered within 0.76 s.

297

298

299

300
